## CORRECTION

# Correction: Cannabis use disorder, suicide attempts, and self-harm among adolescents: A national inpatient study across the United States

The *PLOS ONE* Staff

## Notice of republication

This article was republished on October 24, 2023, to correct the error in the title that was introduced during the typesetting process. The publisher apologizes for the error. Please download this article again to view the correct version. The originally published, uncorrected article and the republished, corrected articles are provided here for reference.

## Supporting information

**S1 File. Originally published, uncorrected article.**

(PDF)

**S2 File. Republished, corrected article.**

(PDF)

## Reference

1. Oladunjoye AF, Li E, Aneni K, Onigu-Otite E (2023) Cannabis use disorder, suicide attempts, and self-harm among adolescents: A national inpatient study across the United States. *PLoS ONE* 18(10): e0292922. <https://doi.org/10.1371/journal.pone.0292922> PMID: 37847698

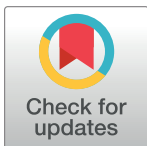

## OPEN ACCESS

**Citation:** The *PLOS ONE* Staff (2023) Correction: Cannabis use disorder, suicide attempts, and self-harm among adolescents: A national inpatient study across the United States. *PLoS ONE* 18(11): e0294303. <https://doi.org/10.1371/journal.pone.0294303>

**Published:** November 30, 2023

**Copyright:** © 2023 The PLOS ONE Staff. This is an open access article distributed under the terms of the [Creative Commons Attribution License](https://creativecommons.org/licenses/by/4.0/), which permits unrestricted use, distribution, and reproduction in any medium, provided the original author and source are credited.
